# Supplementary material
Source: PubMed Central journal article supplement (PMC5004724)
Supplement: mol-22-16_033_Toonen_Suppl.pdf [file mol-22-16_033_Toonen_Suppl.pdf]

## Supplemental Data

# Activation of Proteinase 3 Contributes to Nonalcoholic Fatty Liver Disease and Insulin Resistance

Erik JM Toonen,<sup>1\*</sup> Andreea-Manuela Mirea,<sup>1</sup> Cees J Tack,<sup>1</sup> Rinke Stienstra,<sup>1,2</sup> Dov B Ballak,<sup>1</sup> Janna A van Diepen,<sup>1</sup> Anneke Hijmans,<sup>1</sup> Triantafyllos Chavakis,<sup>3</sup> Wim H Dokter,<sup>4</sup> Christine TN Pham,<sup>5</sup> Mihai G Netea,<sup>1</sup> Charles A Dinarello,<sup>1,6</sup> and Leo AB Joosten<sup>1</sup>

Online address: <http://www.molmed.org>

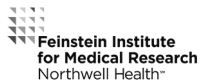

**Supplementary Table S1.** Primers for quantitative PCR.

| Gene symbol        | Forward sequence         | Reverse sequence          |
|--------------------|--------------------------|---------------------------|
| <i>Casp-1</i>      | GGGACCCTCAAGTTTGCC       | GACGTGTACGAGTGGTGTATT     |
| <i>Cd36</i>        | ATGGGCTGTGATCGGAACTG     | GTCTCCCAATTAAGCATGTCTCC   |
| <i>Cd68</i>        | CCAATTCAGGGTGGAAAGAAA    | CTCGGGCTCTGATGTAGGTC      |
| <i>Ctsg (CG)</i>   | AGAAGACTTCGTCCTAACAGCA   | CCTTCTCGCATTGGATGTTGT     |
| <i>Cpt1a</i>       | CTCCGCCTGAGCCATGAAG      | CACCAGTGATGATGCCATTCT     |
| <i>Dgat1</i>       | TCCGTCCAGGGTGGTAGTG      | TGAACAAAGAATCTTGCAGACGA   |
| <i>Elane (NE)</i>  | CCCATCACAACTGCTGAACGA    | AGACATGGAGTCTGTCACCC      |
| <i>Fabp1</i>       | ATGAACTTCTCCGGCAAGTACC   | CTGACACCCCCTTGATGTCC      |
| <i>Fas</i>         | TCCTGGGAGGAATGTAAACAGC   | CACAAATTCATTCACTGCAGCC    |
| <i>IL1b</i>        | GCAACTGTTCTGAACTCAACT    | ATCTTTTGGGGTCCGTCAACT     |
| <i>IL1ra</i>       | AAATCTGCTGGGGACCCTAC     | TGAGCTGGTTGTTCTCAGG       |
| <i>IL6</i>         | CAAGTCGGAGGCTTAATACACATG | ATTGCCATTGCACAACCTCTTTTCT |
| <i>Mcp1</i>        | CCCAATGAGTAGGCTGGAGA     | TCTGGACCCATTCCCTTCTTG     |
| <i>Ppara</i>       | TATTCGGCTGAAGCTGGTGTAC   | CTGGCATTGTTCCGGTCT        |
| <i>Prtn3 (PR3)</i> | ACGGTGGTCACCTTCTATG      | GAATGCCATTGCAGATCAAG      |

PR3 AND NAFLD

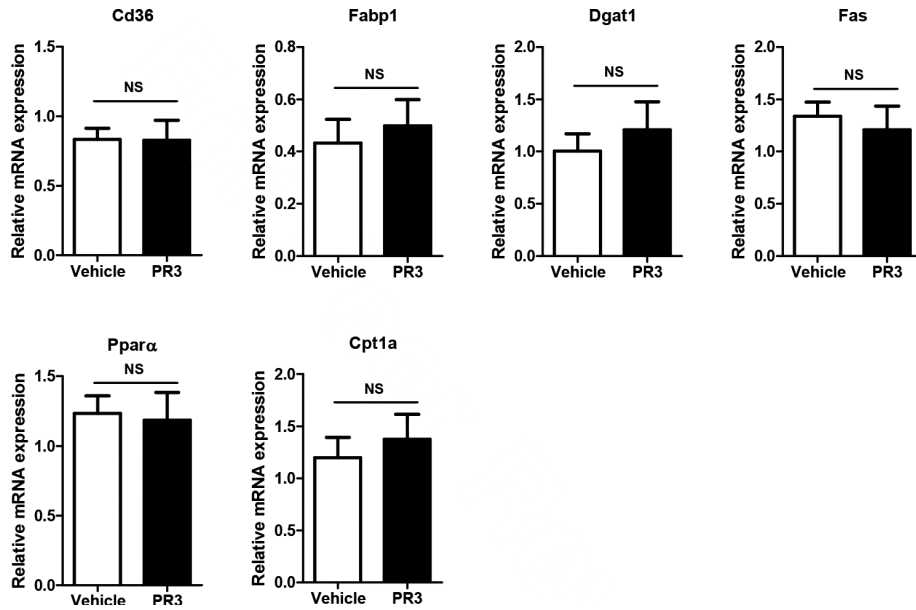

**Supplementary Figure S1.** Relative expression of several lipid metabolism genes in the liver of mice treated with vehicle or proteinase 3. Relative expression of the genes *Cd36*, *Fabp1*, *Dgat1*, *Fas*, *Ppara* and *Cpt1a* in the liver of mice treated with either vehicle or proteinase 3. PR3 = proteinase 3; NS = non-significant.

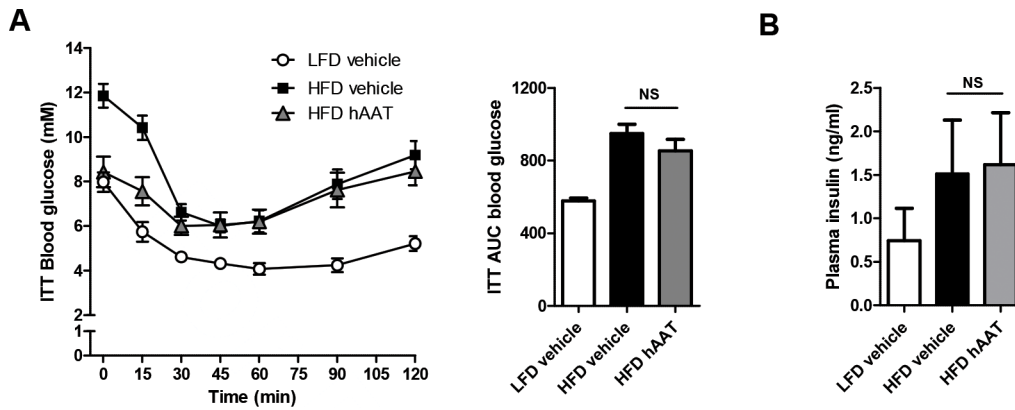

**Supplementary Figure S2.** Insulin tolerance test and insulin values in mice treated with vehicle or human alpha-1 antitrypsin. (A) Insulin tolerance test and ITT AUC values (B) Plasma insulin levels. ITT = insulin tolerance test; LFD = low fat diet; HFD = high fat diet; hAAT = human alpha-1 antitrypsin; AUC = area under curve.

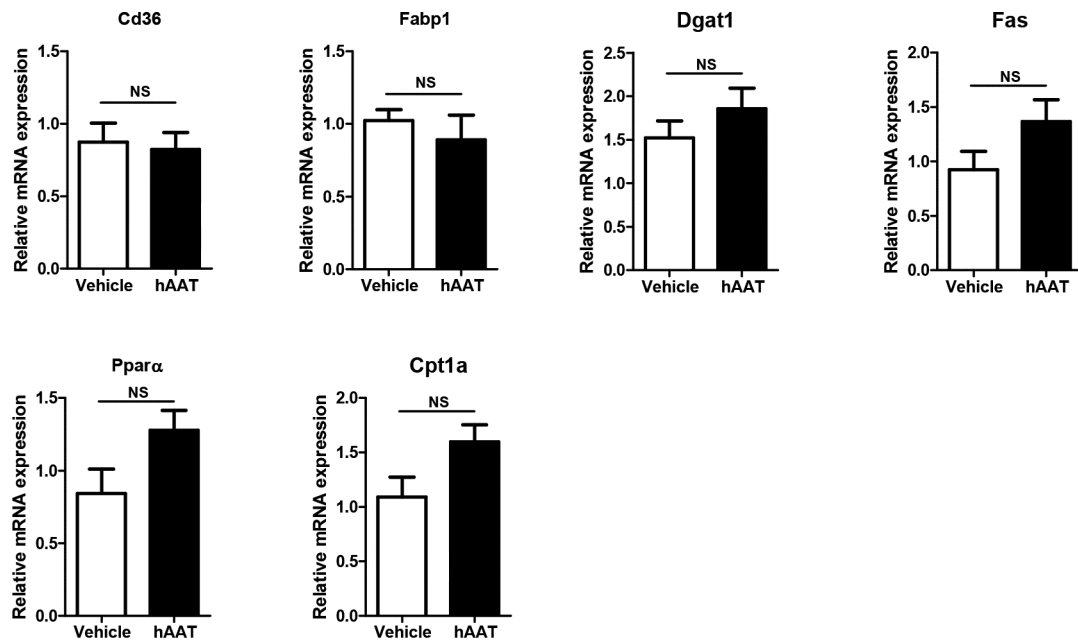

**Supplementary Figure S3.** Relative expression of several lipid metabolism genes in the liver of mice treated with vehicle or human alpha-1 antitrypsin. Relative mRNA expression of *Cd36*, *Fabp1*, *Dgat1*, *Fas*, *Ppara* and *Cpt1a*.
